# Supplementary material for: A generic dual d-band model for interlayer ferromagnetic coupling in a transition-metal doped MnBi2Te4 family of materials
Source: Royal Society of Chemistry journal article supplement (doi:10.1039/d2nr03283j), 2022-01-01
Supplement: d2nr03283j1.pdf [file d2nr03283j1.pdf]

Supplemental Material

**A generic dual  $d$ -band model for interlayer ferromagnetic coupling in transition-metal doped  $\text{MnBi}_2\text{Te}_4$  family of materials**

Huisheng Zhang,<sup>\*a</sup> Jingjing Zhang,<sup>a</sup> Yaling Zhang,<sup>a</sup> Wenjia Yang,<sup>a</sup> Yingying Wang,<sup>a</sup>  
Xiaohong Xu,<sup>\*a</sup> and Feng Liu<sup>\*b</sup>

<sup>a</sup> *College of Physics and Electronic Information & Key Laboratory of Magnetic Molecules and Magnetic Information Materials of Ministry of Education & Research Institute of Materials Science, Shanxi Normal University, Taiyuan, 030031, China*

<sup>b</sup> *Department of Materials Science and Engineering, University of Utah, Salt Lake City, Utah 84112, United States*

*Email: hszhang@sxnu.edu.cn, xuxh@sxnu.edu.cn, fliu@eng.utah.edu*

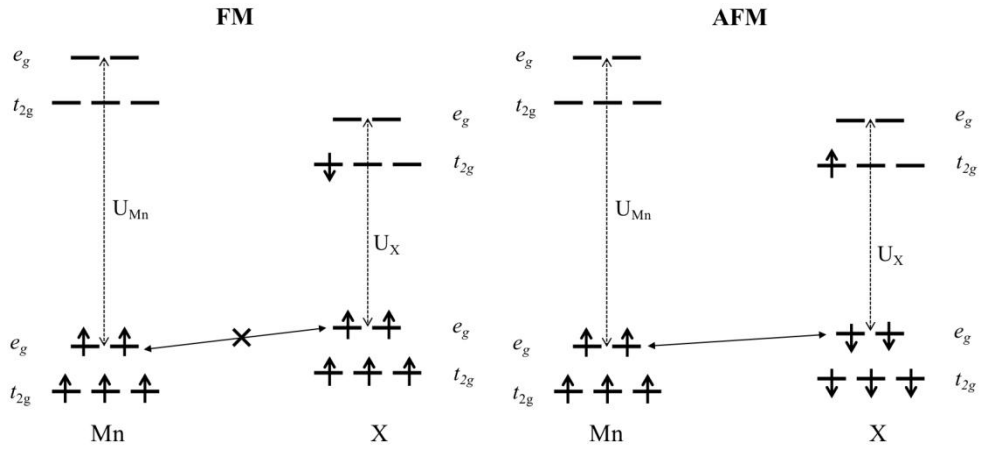

**Fig. S1** Schematic diagrams of ferromagnetic (FM) and antiferromagnetic (AFM) coupling in electron-type (namely, Fe, Co, Ni) transition metal doped  $\text{MnBi}_2\text{Te}_4$  (MBT). They illustrate there is no spin channel open for Mn  $d$ -electron hopping with low energy without spin flipping, so that AFM coupling remains favored.

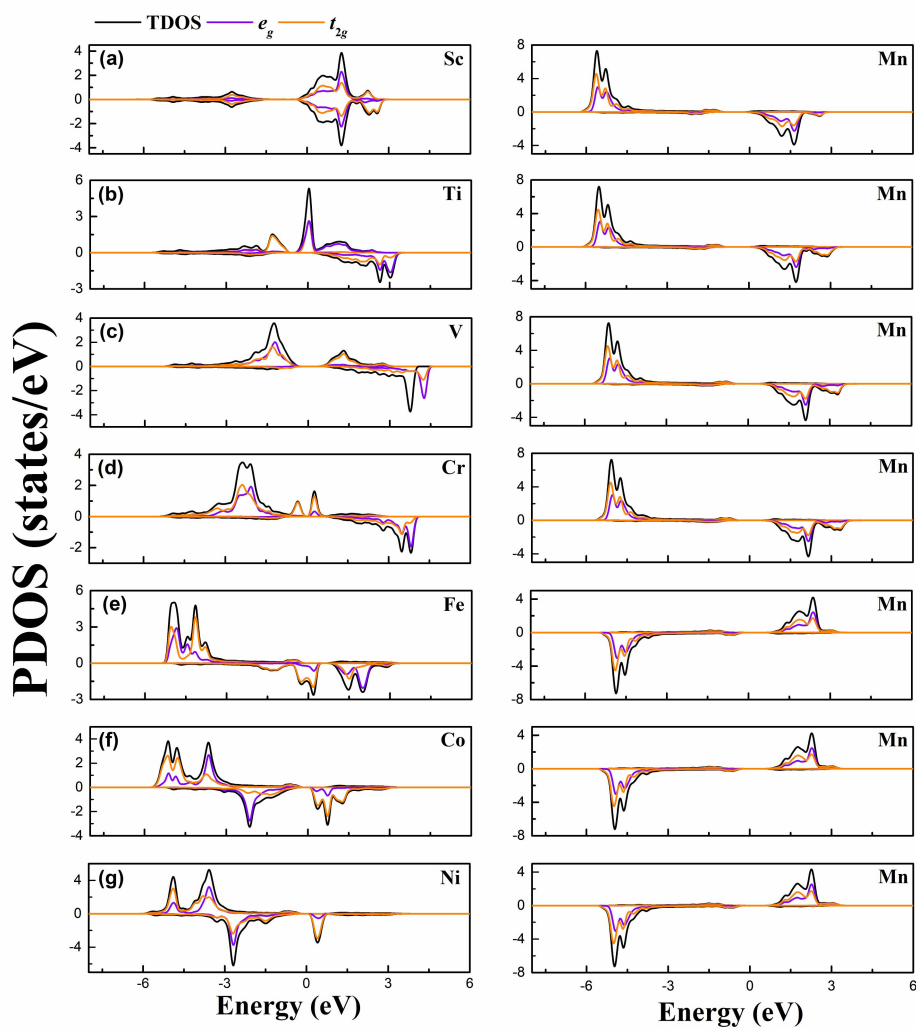

**Fig. S2** Calculated partial density of states (PDOS) of Sc (a), Ti (b), V (c), Cr (d), Fe (e), Co (f) and Ni (g)-doped  $\text{MnBi}_2\text{Te}_4$ . For comparison, the PDOS of Mn is also given for each system. Fermi levels are set to zero.

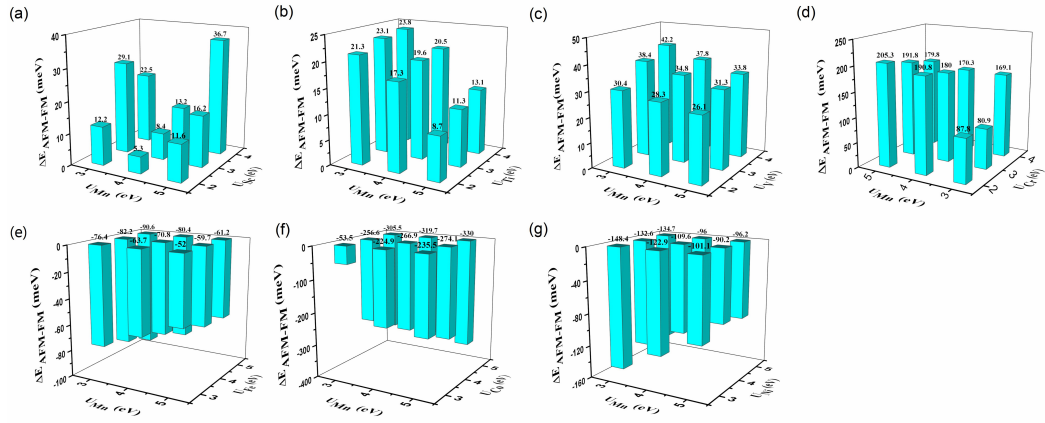

**Fig. S3** Calculated energy difference  $\Delta E_{AFM-FM}$  of the Sc (a), Ti (b), V (c), Cr (d), Fe (e), Co, (f) and Ni (g)-doped  $Mn_2Bi_2Te_5$  monolayers with different effective  $U$  parameters.

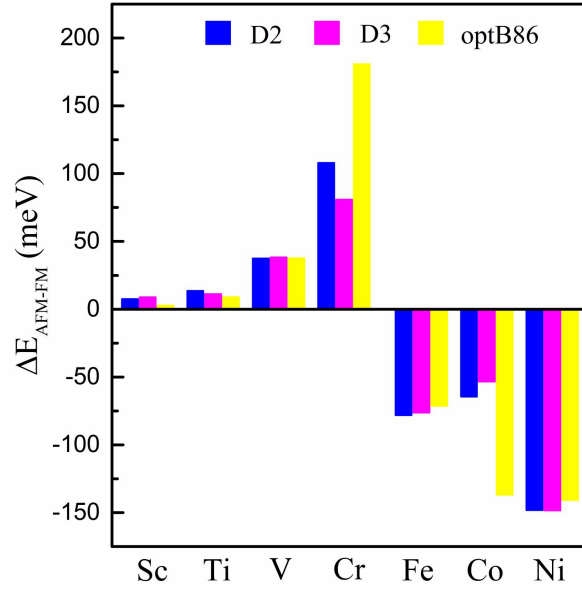

**Fig. S4** Calculated energy difference  $\Delta E_{\text{AFM-FM}}$  of the X-doped (X = Sc, Ti, V, Cr, Fe, Co, or Ni)  $\text{Mn}_2\text{Bi}_2\text{Te}_5$  monolayers by using vdW correction of DFT-D2, DFT-D3, and optB86, respectively.

|                                       | Magnetic configurations |                  |                  |                  |
|---------------------------------------|-------------------------|------------------|------------------|------------------|
|                                       | AFM                     |                  |                  | FM               |
|                                       | ↑<br>↓<br>↑<br>↓        | ↑<br>↓<br>↓<br>↑ | ↑<br>↑<br>↓<br>↓ | ↑<br>↑<br>↑<br>↑ |
| $E_{\text{MnScBi}_2\text{Te}_5}$ (eV) | -83.911                 | -83.910          | -83.914          | -83.916          |
| $E_{\text{MnTiBi}_2\text{Te}_5}$ (eV) | -84.406                 | -84.407          | -84.423          | -84.429          |
| $E_{\text{MnVBi}_2\text{Te}_5}$ (eV)  | -85.721                 | -85.723          | -85.791          | -85.799          |
| $E_{\text{MnCrBi}_2\text{Te}_5}$ (eV) | -86.600                 | -86.599          | -86.940          | -86.951          |

**Fig. S5** Total energies of  $\text{MnScBi}_2\text{Te}_5$ ,  $\text{MnTiBi}_2\text{Te}_5$ ,  $\text{MnVBi}_2\text{Te}_5$ , and  $\text{MnCrBi}_2\text{Te}_5$  bilayers for three types of antiferromagnetic (AFM) and one type ferromagnetic (FM) orders.

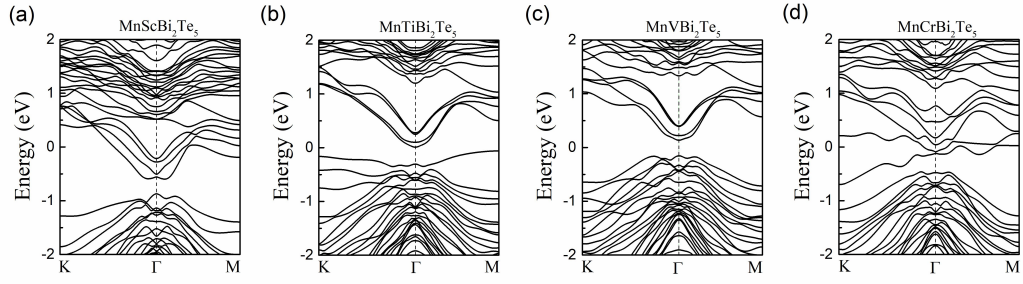

**Fig. S6** The electronic band structures of MnScBi<sub>2</sub>Te<sub>5</sub> (a), MnTiBi<sub>2</sub>Te<sub>5</sub> (b), MnVBi<sub>2</sub>Te<sub>5</sub> (c), and MnCrBi<sub>2</sub>Te<sub>5</sub> (d) including spin-orbit coupling, respectively.

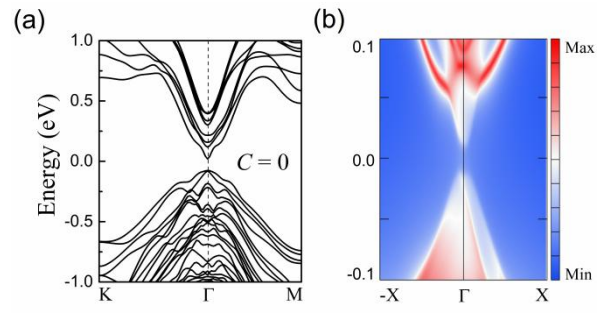

**Fig. S7** (a) The electronic band structures of MnVBi<sub>2</sub>Te<sub>5</sub> bilayer, where the calculated Chern number  $C$  is 0. (b) The corresponding bands showing no edge state.



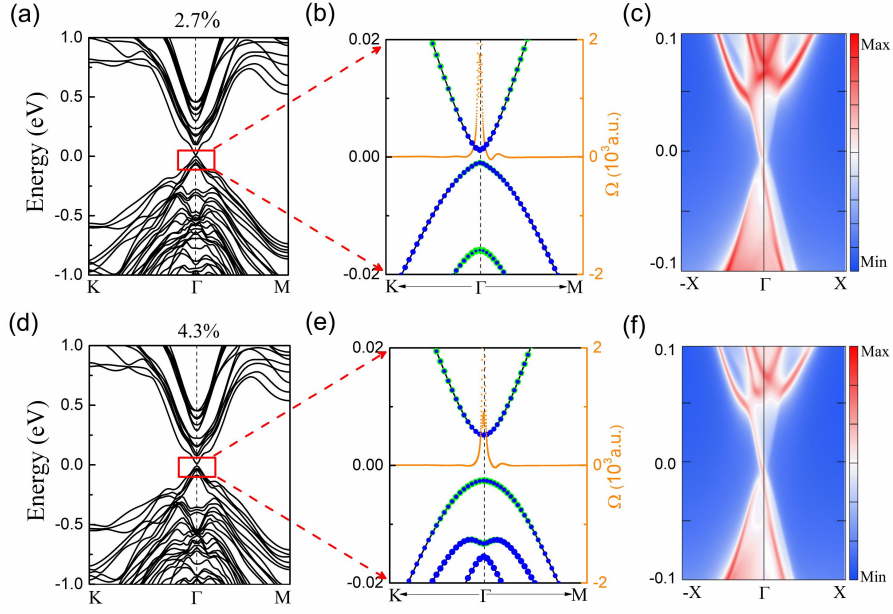

**Fig. S8** (a) Electronic band structures of MnVBi<sub>2</sub>Te<sub>5</sub> trilayer by applying 2.7% biaxial tensile strain. (b) Magnified bands near Fermi level in (a), where projected bands of Bi- $p_z$  and Te- $p_z$  orbitals are also given. (c) The corresponding edge states. (d)-(f) The same as (a)-(c) for MnVBi<sub>2</sub>Te<sub>5</sub> trilayer with 4.3% biaxial tensile strain. Fermi levels are set to zero.

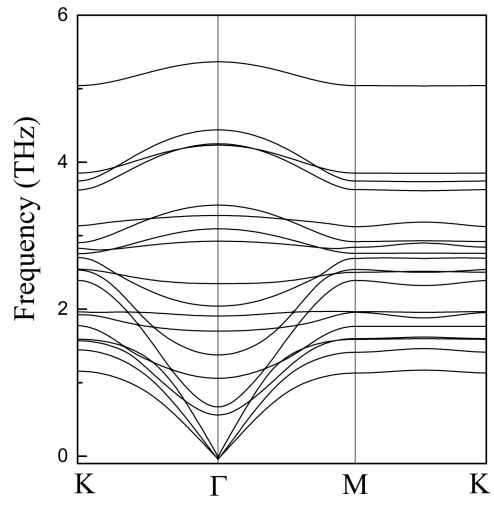

**Fig. S9** Calculated phonon spectra of MnVBi<sub>2</sub>Te<sub>5</sub> monolayer.

(a)

| Structual configurations                                     | 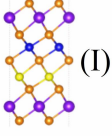 (I) |  (II) |  (III) |
|--------------------------------------------------------------|---------------------------------------------------------------------------------------|-----------------------------------------------------------------------------------------|-------------------------------------------------------------------------------------------|
| $E_{\text{FM}}$ (eV) $\uparrow\uparrow\downarrow\downarrow$  | -85.425206                                                                            | -85.409106                                                                              | -85.487828                                                                                |
| $E_{\text{AFM}}$ (eV) $\uparrow\uparrow\downarrow\downarrow$ | -85.388309                                                                            | -85.479983                                                                              | -85.406927                                                                                |

(b)

| Structual configurations                                     |  |  |  |
|--------------------------------------------------------------|-----------------------------------------------------------------------------------|------------------------------------------------------------------------------------|-------------------------------------------------------------------------------------|
| $E_{\text{FM}}$ (eV) $\uparrow\uparrow\uparrow\uparrow$      | -85.799402                                                                        | -85.796374                                                                         | -85.790626                                                                          |
| $E_{\text{AFM}}$ (eV) $\uparrow\uparrow\downarrow\downarrow$ | -85.798253                                                                        | -85.796558                                                                         | -85.792183                                                                          |
| $E_{\text{AFM}}$ (eV) $\uparrow\downarrow\uparrow\downarrow$ | -85.721508                                                                        | -85.720240                                                                         | -85.725749                                                                          |
| $E_{\text{AFM}}$ (eV) $\uparrow\downarrow\downarrow\uparrow$ | -85.723198                                                                        | -85.719410                                                                         | -85.723668                                                                          |

**Fig. S10** (a) Total energies of FM and AFM MnVBi<sub>2</sub>Te<sub>5</sub> monolayer in a 2 × 1 × 1 supercell. (b) The same as (a) for MnVBi<sub>2</sub>Te<sub>5</sub> bilayer. The black arrows denote the directions of magnetic moments of V or Mn.

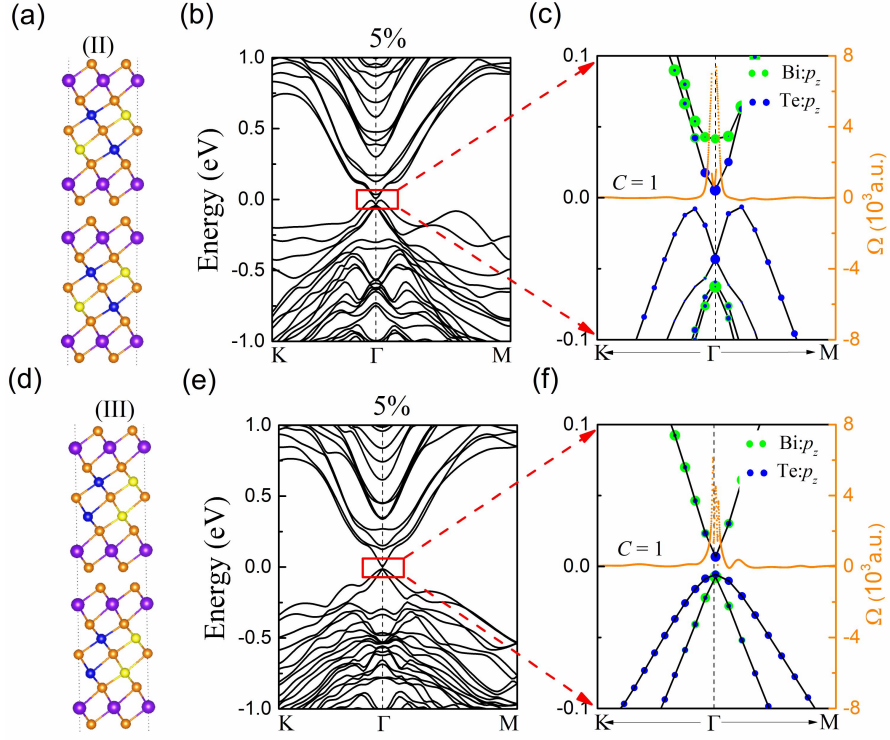

**Fig. S11** (a) Structural configuration (II) of  $\text{MnVBi}_2\text{Te}_5$  bilayer in Fig. S10. (b) Corresponding electronic band structure by applying 5.0% biaxial tensile strain. (c) Magnified bands near Fermi level in (b), where projected bands of Bi- $p_z$  and Te- $p_z$  orbitals are also given. (d)-(f) The same as (a)-(c) for structural configuration (III) of  $\text{MnVBi}_2\text{Te}_5$  bilayer in Fig. S10. Fermi levels are set to zero.

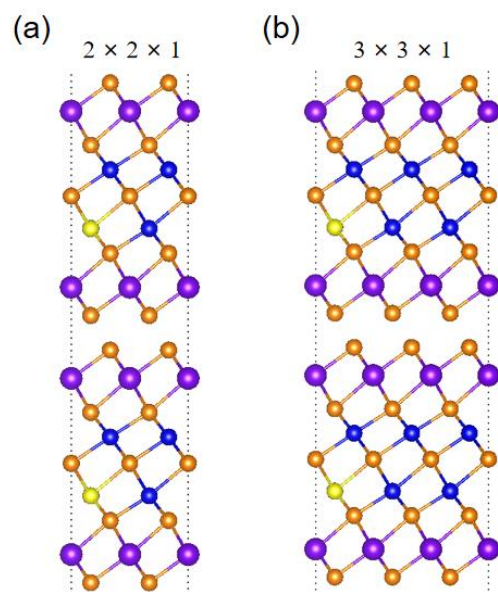

**Fig. S12** The crystal structures of V-doped  $M_2BT$  with the 25% (a) and 11.1% (b) doping concentration, respectively.
